# Supplementary material
Source: Elsevier journal article supplement (https://comptes-rendus.academie-sciences.fr/chimie/article/10.1016/j.crci.2013.02.013/file/attach/mmc1.pdf)

# checkCIF/PLATON report

You have not supplied any structure factors. As a result the full set of tests cannot be run.

No syntax errors found.      CIF dictionary      Interpreting this report

## Datablock: shelxl

---

Bond precision:    C-C = 0.0123 A                      Wavelength=0.71073

Cell:                      a=14.207(2)              b=13.9892(14)              c=16.133(3)  
                                    alpha=90                      beta=113.877(12)              gamma=90

Temperature:              150 K

|                | Calculated            | Reported              |
|----------------|-----------------------|-----------------------|
| Volume         | 2931.9(8)             | 2932.1(7)             |
| Space group    | P 21/c                | P21/c                 |
| Hall group     | -P 2ybc               | ?                     |
| Moiety formula | C26 H34 Br4 Cl2 Cu N4 | ?                     |
| Sum formula    | C26 H34 Br4 Cl2 Cu N4 | C26 H34 Br4 Cl2 Cu N4 |
| Mr             | 856.62                | 856.65                |
| Dx,g cm-3      | 1.941                 | 1.941                 |
| Z              | 4                     | 4                     |
| Mu (mm-1)      | 6.403                 | 6.420                 |
| F000           | 1684.0                | 1684.0                |
| F000'          | 1682.56               |                       |
| h,k,lmax       | 19,19,22              | 19,19,22              |
| Nref           | 8543                  | 8517                  |
| Tmin,Tmax      | 0.327,0.598           | 0.489,0.833           |
| Tmin'          | 0.266                 |                       |

Correction method= INTEGRATION

Data completeness= 0.997                      Theta(max)= 30.000

R(reflections)= 0.0594( 3449)                      wR2(reflections)= 0.1405( 8517)

S = 0.854                                      Npar= 335

---

The following ALERTS were generated. Each ALERT has the format

**test-name\_ALERT\_alert-type\_alert-level.**

Click on the hyperlinks for more details of the test.

---

### Alert level C

|                   |                                                      |            |
|-------------------|------------------------------------------------------|------------|
| PLAT026_ALERT_3_C | Ratio Observed / Unique Reflections too Low ....     | 40 Perc.   |
| PLAT230_ALERT_2_C | Hirshfeld Test Diff for    C3    --    C4    ..      | 6.6 su     |
| PLAT341_ALERT_3_C | Low Bond Precision on    C-C Bonds .....             | 0.0123 Ang |
| PLAT410_ALERT_2_C | Short Intra H...H Contact    H1A    ..    H11B    .. | 1.91 Ang.  |

● **Alert level G**

|                   |                                                  |      |
|-------------------|--------------------------------------------------|------|
| PLAT005_ALERT_5_G | No _iucr_refine_instructions_details in CIF .... | ?    |
| PLAT793_ALERT_4_G | The Model has Chirality at N1 (Verify) ....      | R    |
| PLAT793_ALERT_4_G | The Model has Chirality at N2 (Verify) ....      | R    |
| PLAT793_ALERT_4_G | The Model has Chirality at N3 (Verify) ....      | R    |
| PLAT793_ALERT_4_G | The Model has Chirality at N4 (Verify) ....      | R    |
| PLAT794_ALERT_5_G | Note: Tentative Bond Valency for Cul (II)        | 1.96 |

0 **ALERT level A** = Most likely a serious problem - resolve or explain  
 0 **ALERT level B** = A potentially serious problem, consider carefully  
 5 **ALERT level C** = Check. Ensure it is not caused by an omission or oversight  
 6 **ALERT level G** = General information/check it is not something unexpected

0 ALERT type 1 CIF construction/syntax error, inconsistent or missing data  
 3 ALERT type 2 Indicator that the structure model may be wrong or deficient  
 2 ALERT type 3 Indicator that the structure quality may be low  
 4 ALERT type 4 Improvement, methodology, query or suggestion  
 2 ALERT type 5 Informative message, check

It is advisable to attempt to resolve as many as possible of the alerts in all categories. Often the minor alerts point to easily fixed oversights, errors and omissions in your CIF or refinement strategy, so attention to these fine details can be worthwhile. In order to resolve some of the more serious problems it may be necessary to carry out additional measurements or structure refinements. However, the purpose of your study may justify the reported deviations and the more serious of these should normally be commented upon in the discussion or experimental section of a paper or in the "special\_details" fields of the CIF. checkCIF was carefully designed to identify outliers and unusual parameters, but every test has its limitations and alerts that are not important in a particular case may appear. Conversely, the absence of alerts does not guarantee there are no aspects of the results needing attention. It is up to the individual to critically assess their own results and, if necessary, seek expert advice.

**Publication of your CIF in IUCr journals**

A basic structural check has been run on your CIF. These basic checks will be run on all CIFs submitted for publication in IUCr journals (*Acta Crystallographica*, *Journal of Applied Crystallography*, *Journal of Synchrotron Radiation*); however, if you intend to submit to *Acta Crystallographica Section C* or *E*, you should make sure that full publication checks are run on the final version of your CIF prior to submission.

**Publication of your CIF in other journals**

Please refer to the *Notes for Authors* of the relevant journal for any special instructions relating to CIF submission.

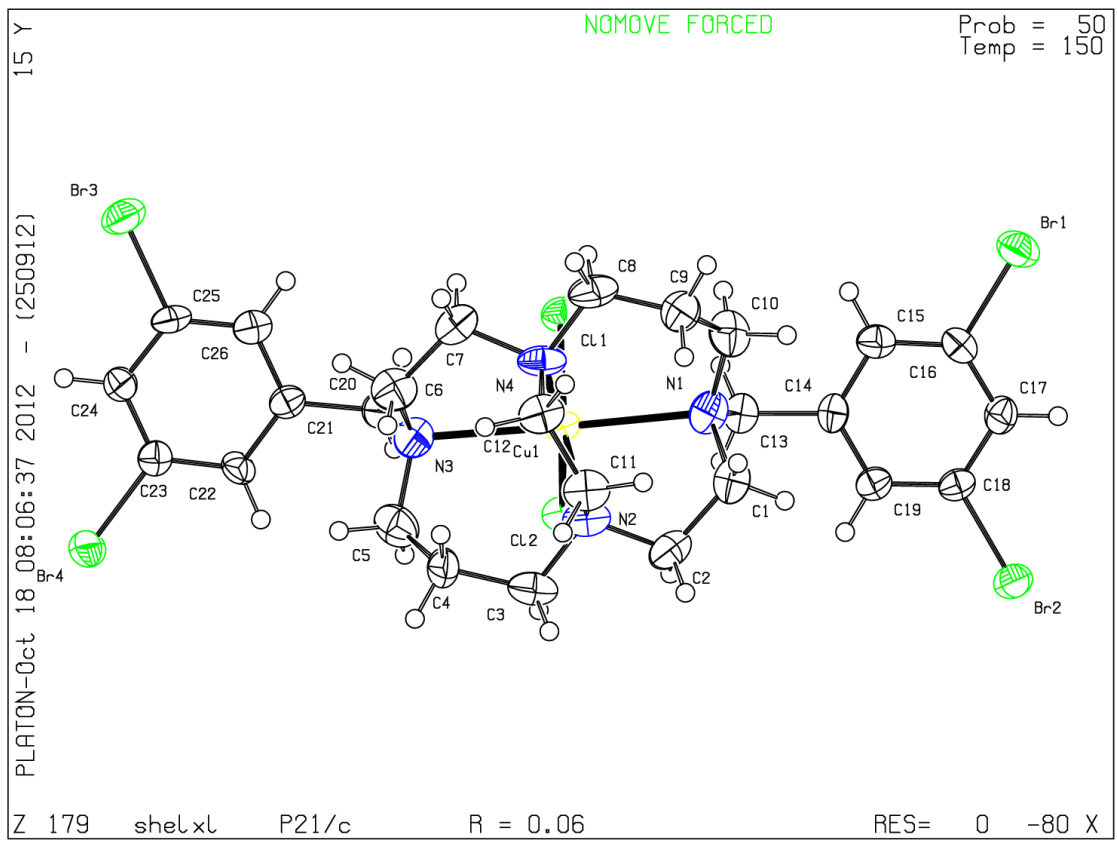

# checkCIF/PLATON report

You have not supplied any structure factors. As a result the full set of tests cannot be run.

No syntax errors found.      CIF dictionary      Interpreting this report

## Datablock: shelxl

---

Bond precision:    C-C = 0.0062 A                      Wavelength=0.71073

Cell:              a=8.7231(15)              b=14.248(3)              c=14.316(2)  
                    alpha=117.139(12)      beta=100.121(13)      gamma=95.291(14)

Temperature:    150 K

|                | Calculated                       | Reported         |
|----------------|----------------------------------|------------------|
| Volume         | 1528.3(5)                        | 1528.3(5)        |
| Space group    | P -1                             | P-1              |
| Hall group     | -P 1                             | ?                |
| Moiety formula | C28 H42 Cu N5 O3, N O3, C<br>H O | ?                |
| Sum formula    | C29 H43 Cu N6 O7                 | C29 H43 Cu N6 O7 |
| Mr             | 651.24                           | 651.23           |
| Dx, g cm-3     | 1.415                            | 1.415            |
| Z              | 2                                | 2                |
| Mu (mm-1)      | 0.770                            | 0.770            |
| F000           | 688.0                            | 688.0            |
| F000'          | 688.91                           |                  |
| h,k,lmax       | 12,20,20                         | 12,20,20         |
| Nref           | 8906                             | 8901             |
| Tmin,Tmax      | 0.887,0.926                      | 0.817,0.975      |
| Tmin'          | 0.812                            |                  |

Correction method= INTEGRATION

Data completeness= 0.999                      Theta(max)= 30.000

R(reflections)= 0.0510( 3806)              wR2(reflections)= 0.1406( 8901)

S = 0.802                                      Npar= 390

---

The following ALERTS were generated. Each ALERT has the format

**test-name\_ALERT\_alert-type\_alert-level.**

Click on the hyperlinks for more details of the test.

---

### Alert level C

|                                                                    |            |
|--------------------------------------------------------------------|------------|
| PLAT026_ALERT_3_C Ratio Observed / Unique Reflections too Low .... | 43 Perc.   |
| PLAT244_ALERT_4_C Low 'Solvent' Ueq as Compared to Neighbors of N6 | N6         |
| PLAT341_ALERT_3_C Low Bond Precision on C-C Bonds .....            | 0.0062 Ang |

|                   |                           |     |    |      |    |      |      |
|-------------------|---------------------------|-----|----|------|----|------|------|
| PLAT410_ALERT_2_C | Short Intra H...H Contact | H2B | .. | H4A  | .. | 1.99 | Ang. |
| PLAT410_ALERT_2_C | Short Intra H...H Contact | H7B | .. | H9B  | .. | 1.98 | Ang. |
| PLAT410_ALERT_2_C | Short Intra H...H Contact | H7B | .. | H11A | .. | 1.99 | Ang. |
| PLAT410_ALERT_2_C | Short Intra H...H Contact | H9B | .. | H11A | .. | 1.95 | Ang. |

---

● **Alert level G**

|                   |                                                  |  |  |  |  |  |      |
|-------------------|--------------------------------------------------|--|--|--|--|--|------|
| PLAT005_ALERT_5_G | No _iucr_refine_instructions_details in CIF .... |  |  |  |  |  | ?    |
| PLAT007_ALERT_5_G | Note: Number of Unrefined D-H Atoms .....        |  |  |  |  |  | 1    |
| PLAT344_ALERT_2_G | Check sp? Angle Range in Solvent/Ion for ...     |  |  |  |  |  | C29  |
| PLAT380_ALERT_4_G | Check Incorrectly? Oriented X(sp2)-Methyl Moiety |  |  |  |  |  | C28  |
| PLAT790_ALERT_4_G | Centre of Gravity not Within Unit Cell: Resd. #  |  |  |  |  |  | 2    |
|                   | N O3                                             |  |  |  |  |  |      |
| PLAT790_ALERT_4_G | Centre of Gravity not Within Unit Cell: Resd. #  |  |  |  |  |  | 3    |
|                   | C H O                                            |  |  |  |  |  |      |
| PLAT793_ALERT_4_G | The Model has Chirality at N1 (Verify) ....      |  |  |  |  |  | S    |
| PLAT793_ALERT_4_G | The Model has Chirality at N2 (Verify) ....      |  |  |  |  |  | S    |
| PLAT793_ALERT_4_G | The Model has Chirality at N3 (Verify) ....      |  |  |  |  |  | S    |
| PLAT793_ALERT_4_G | The Model has Chirality at N4 (Verify) ....      |  |  |  |  |  | S    |
| PLAT794_ALERT_5_G | Note: Tentative Bond Valency for Cul (II)        |  |  |  |  |  | 1.98 |

---

0 **ALERT level A** = Most likely a serious problem - resolve or explain  
0 **ALERT level B** = A potentially serious problem, consider carefully  
7 **ALERT level C** = Check. Ensure it is not caused by an omission or oversight  
11 **ALERT level G** = General information/check it is not something unexpected

0 ALERT type 1 CIF construction/syntax error, inconsistent or missing data  
5 ALERT type 2 Indicator that the structure model may be wrong or deficient  
2 ALERT type 3 Indicator that the structure quality may be low  
8 ALERT type 4 Improvement, methodology, query or suggestion  
3 ALERT type 5 Informative message, check

---

It is advisable to attempt to resolve as many as possible of the alerts in all categories. Often the minor alerts point to easily fixed oversights, errors and omissions in your CIF or refinement strategy, so attention to these fine details can be worthwhile. In order to resolve some of the more serious problems it may be necessary to carry out additional measurements or structure refinements. However, the purpose of your study may justify the reported deviations and the more serious of these should normally be commented upon in the discussion or experimental section of a paper or in the "special\_details" fields of the CIF. checkCIF was carefully designed to identify outliers and unusual parameters, but every test has its limitations and alerts that are not important in a particular case may appear. Conversely, the absence of alerts does not guarantee there are no aspects of the results needing attention. It is up to the individual to critically assess their own results and, if necessary, seek expert advice.

### **Publication of your CIF in IUCr journals**

A basic structural check has been run on your CIF. These basic checks will be run on all CIFs submitted for publication in IUCr journals (*Acta Crystallographica*, *Journal of Applied Crystallography*, *Journal of Synchrotron Radiation*); however, if you intend to submit to *Acta Crystallographica Section C* or *E*, you should make sure that full publication checks are run on the final version of your CIF prior to submission.

### **Publication of your CIF in other journals**

Please refer to the *Notes for Authors* of the relevant journal for any special instructions relating to CIF submission.

---

**PLATON version of 25/09/2012; check.def file version of 20/09/2012**

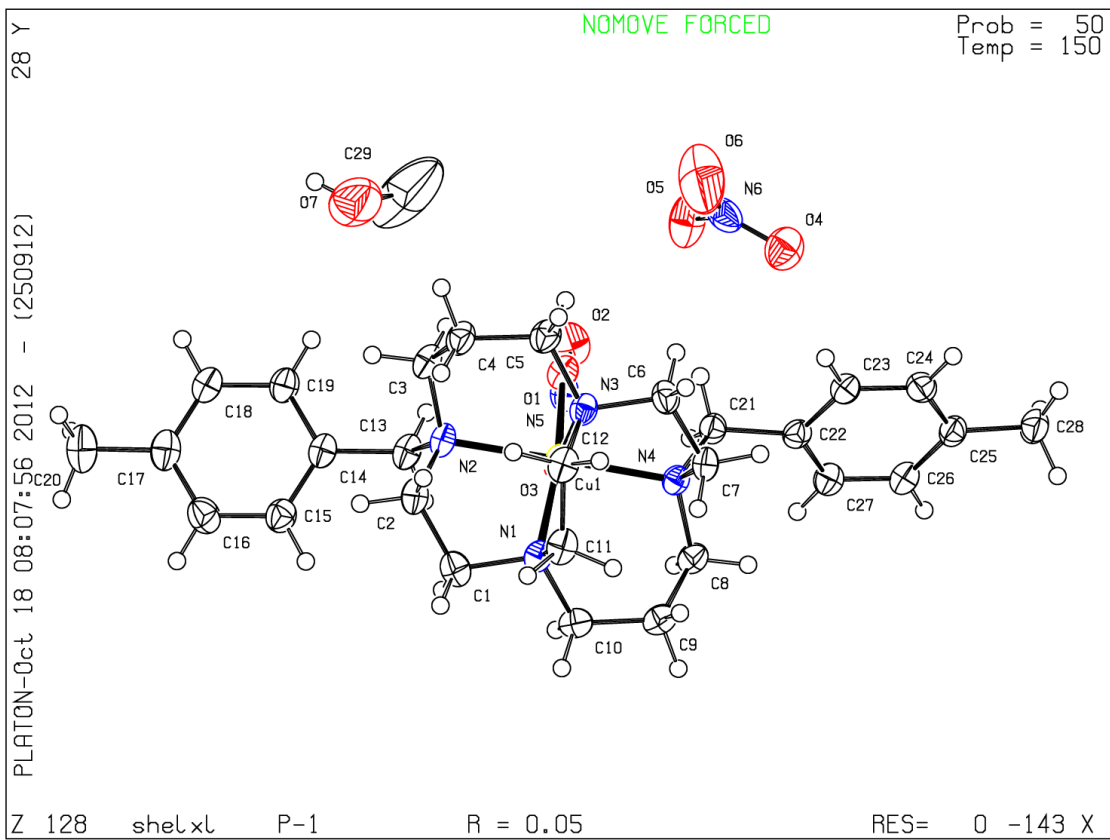

Supplement: mmc1 [file mmc1.pdf]
